# Supplementary material
Source: PubMed Central journal article supplement (PMC4005881)
Supplement: NIHMS569136-supplement-01.pdf [file NIHMS569136-supplement-01.pdf]

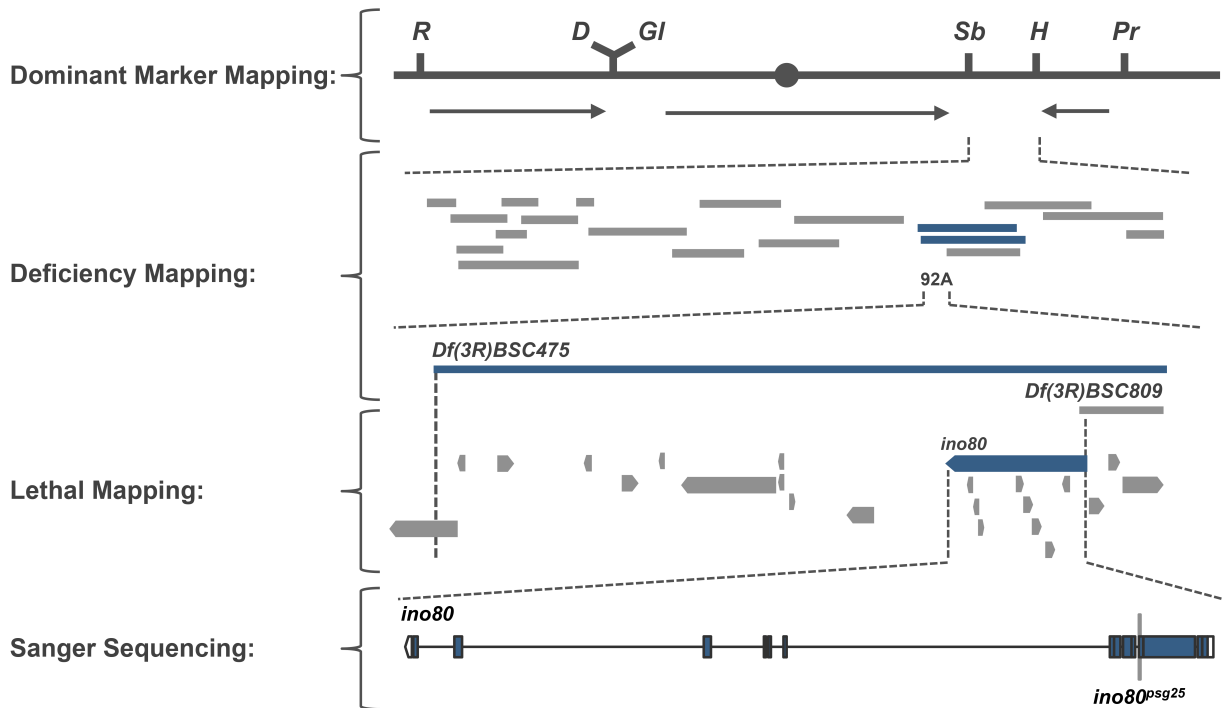

**Figure S1. Mapping of the *psg25* mutation.** *psg25* was mapped by dominant marker recombination, complementation tests, and Sanger sequencing. Recombination mapping with pairs of dominant markers placed *psg25* in the *Stubble* (*Sb*), *Hairless* (*H*) region, right of the *Roughened* (*R*), *Dichaete* (*D*) and *Glued* (*Gl*), *Stubble* (*Sb*) regions and left of the *Hairless* (*H*), *Prickly* (*Pr*) region (see arrows, method described in Sapiro *et al.* 2013). *psg25* failed to complement two overlapping chromosomal deficiencies, but complemented all available lethals in the region. Sanger sequencing of candidate genes identified a lesion disrupting the donor splice site after the fourth exon of *ino80*. The entire *ino80* locus encompasses over 34 kilobases.

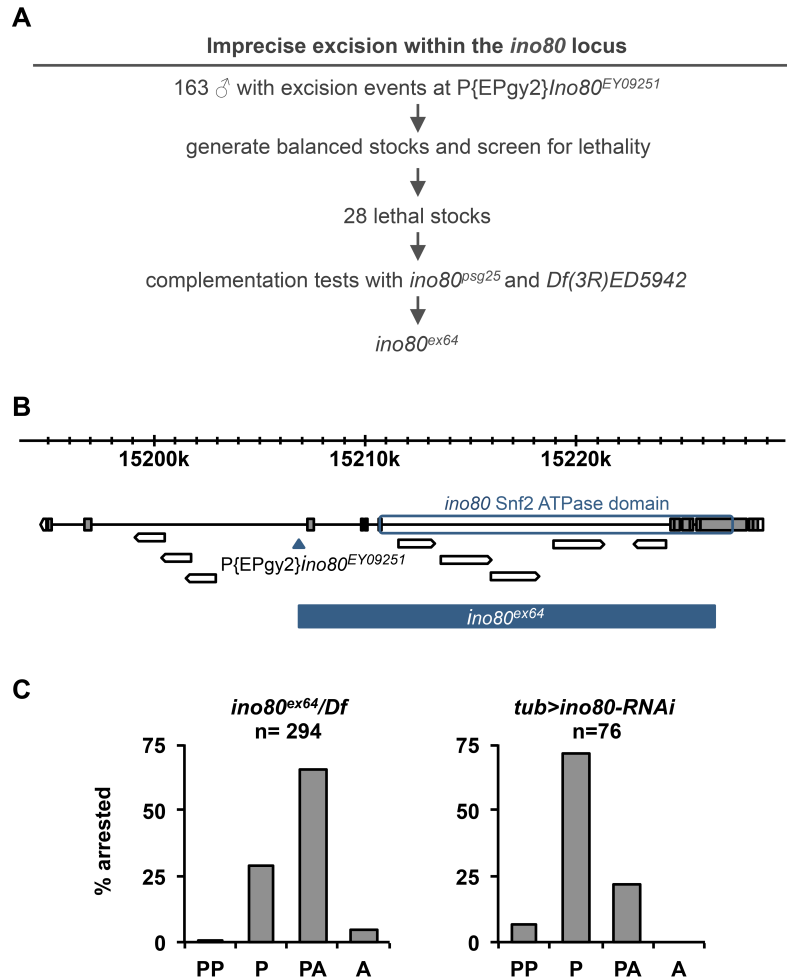

**Figure S2. Generation of a second *ino80* allele via imprecise excision.** (A) Diagram of crosses used to generate imprecise excision stocks. Of 163 excision events tested, only one excision, *ex64*, failed to complement the *ino80*-containing chromosomal deficiency. (B) Characterization of the molecular lesion in *ino80*<sup>ex64</sup>. PCR analysis identified a large deletion within the *ino80* locus, removing most of the Snf2 ATPase domain and leaving a region of P-element sequence behind. (C) Lethal phase analysis of *ino80*<sup>ex64</sup>/*Df* and ubiquitous expression of *ino80*-RNAi (*UAS-ino80*-RNAi/*UAS-Dcr-2*; *tubulin*-GAL4). Most *ino80*<sup>ex64</sup> and *ino80*-RNAi animals arrest after head eversion, as pupae or pharate adults.

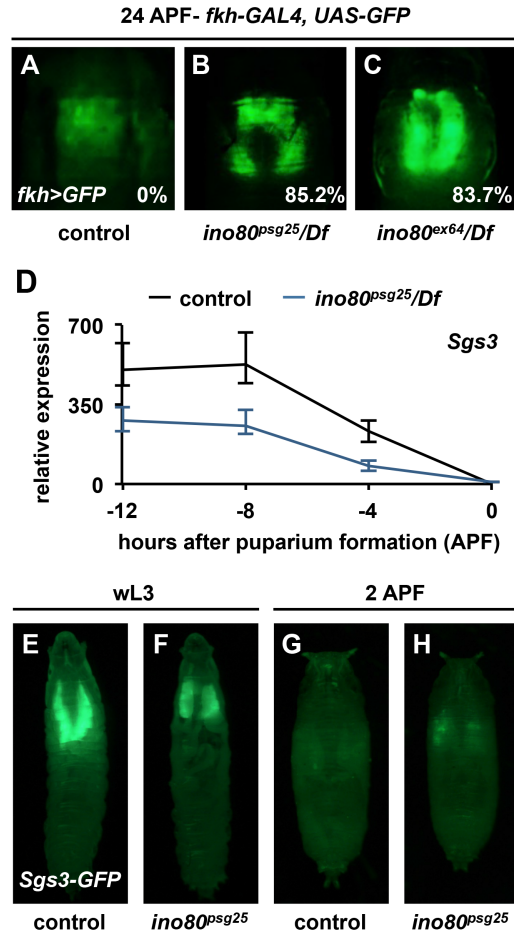

**Figure S3. Analysis of ecdysone-dependent responses in *ino80<sup>psg25</sup>* mutant salivary glands.** (A-C) *fkh-GAL4*, *UAS-GFP* expression in control (A), *ino80<sup>psg25</sup>/Df* (B), and *ino80<sup>ex64</sup>/Df* (C) mutant animals at 24 h after puparium formation (APF). (A) Control glands have diffuse GFP expression, indicating the glands have been eliminated via programmed cell death. (B-C) *ino80<sup>psg25</sup>* and *ino80<sup>ex64</sup>* mutant animals have strong expression of GFP at 24 APF, indicative a persistent salivary gland phenotype (85.2%, n=54 and 83.7%, n=37, respectively). (D) qPCR analysis of *Sgs3* mRNA expression in control (black line) and *ino80<sup>psg25</sup>* (blue line) mutant whole animals. *Sgs3* transcription is induced and repressed properly in *ino80<sup>psg25</sup>*. y-axis represents relative expression compared to the lowest point in control animals; x-axis represents developmental stage relative to puparium formation (APF). Three independently-isolated samples were run for each timepoint; relative expression calculated by normalizing to *rp49*. (E-H) *Sgs3-GFP* expression in control (E,G) and *ino80<sup>psg25</sup>* (F,H) mutant animals. (E,F) Both genotypes robustly express *Sgs3-GFP* in wL3, indicating that *ino80<sup>psg25</sup>* does not disrupt glue protein synthesis. (G,H) *Sgs3-GFP* is no longer present in salivary glands of either genotype at 2 APF, indicating that *ino80<sup>psg25</sup>* does not disrupt glue protein secretion.

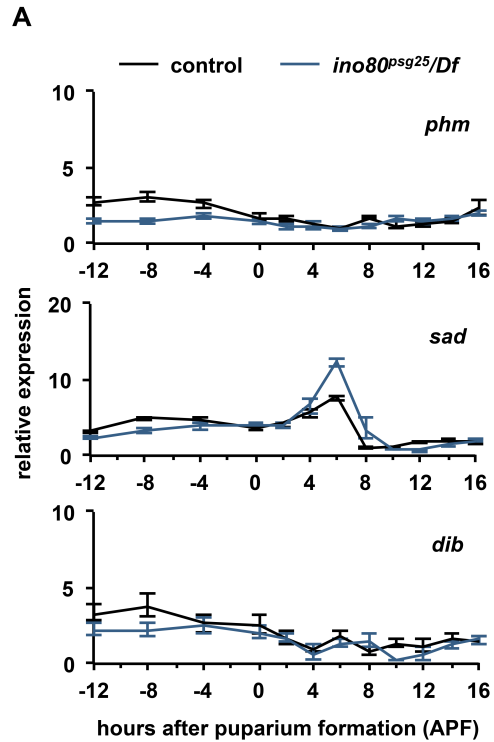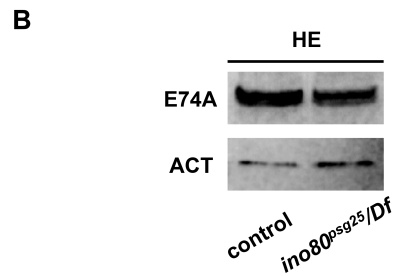

**Figure S4. *ino80* is not required for repression of all genes during prepupal development.**

**(A)** qPCR analysis of ecdysone biosynthesis genes in whole animals staged relative to puparium formation. *ino80<sup>psg25</sup>* (blue line) does not disrupt expression of *phantom* (*phm*), *shadow* (*sad*), or *disembodied* (*dib*) when compared to controls (black line). *y*-axis represents relative expression compared to the lowest point in control animals; *x*-axis represents developmental stage relative to puparium formation (APF). Three independently-isolated samples were run for each timepoint; relative expression calculated by normalizing to *rp49*. **(B)** Western blot for E74A protein in control and *ino80<sup>psg25</sup>* mutant whole animals at head eversion. E74A is robustly translated in both control and *ino80<sup>psg25</sup>* animals.  $\beta$ -actin used as a loading control.

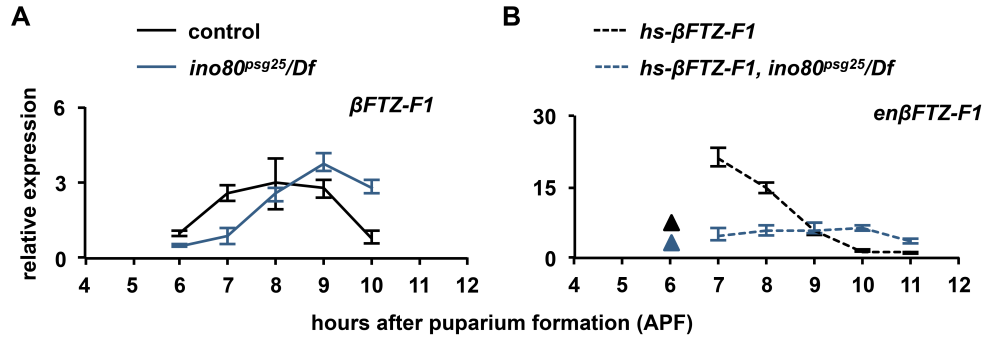

**Figure S5. Regulation of  $\beta$ FTZ-F1 expression in control and *ino80<sup>psg25</sup>* mutant animals. (A) qPCR analysis of  $\beta$ FTZ-F1 expression in control (black line) and *ino80<sup>psg25</sup>* mutant (blue line) animals in one-hour increments.  $\beta$ FTZ-F1 induction is delayed by about 1 hour in *ino80<sup>psg25</sup>*. y-axis plots relative expression compared to the lowest point in controls; x-axis represents hours relative to puparium formation. Three independently-isolated whole animal samples were run for each timepoint and normalized to *rp49*. (B) Expression of  $\beta$ FTZ-F1 protein at 6 APF abolishes endogenous  $\beta$ FTZ-F1 transcription in *ino80<sup>psg25</sup>* mutant animals. qPCR analysis of endogenous  $\beta$ FTZ-F1 expression after heat-treatment with *hs- $\beta$ FTZ-F1* at 6 APF in control (dashed black line) and *ino80<sup>psg25</sup>* mutant (dashed blue line) animals. y-axis plots relative expression compared to the lowest point in controls; x-axis represents stages relative to puparium formation. Three independently-isolated whole animal samples were run for each timepoint and normalized to *rp49*. Triangles denote the time of heat-shock (black=control, blue=*ino80<sup>psg25</sup>*).**

**TABLE S1. Primer sequences for qPCR**

| <b>Gene</b>        | <b>Primer Sequence</b>     | <b>Source</b>             |
|--------------------|----------------------------|---------------------------|
| <i>Cyp18a1 F</i>   | TCTTCGATGGCAAGAATCACGAG    | This Study                |
| <i>Cyp18a1 R</i>   | TATCCACAGCAGGGTGGTCTTG     |                           |
| <i>DHR3 F</i>      | GGCAGGAGCTGGAAACGAATC      | This Study                |
| <i>DHR3 R</i>      | GGTCCTGCTGCGAATCTATCG      |                           |
| <i>dib F</i>       | GTGACCAAGGAGTTCATTAGATTTTC | (Deng and Kerppola, 2013) |
| <i>dib R</i>       | CCAAAGGTAAGCAAACAGGTTAAT   |                           |
| <i>E74A F</i>      | GTTGCCGGAACATTATGGATATA    | (Caldwell et al., 2005)   |
| <i>E74A R</i>      | GCCCTATGTCGGCTTGCT         |                           |
| <i>E74B F</i>      | ATCGGCGGCCTACAAGAAG        | (Caldwell et al., 2005)   |
| <i>E74B R</i>      | TCGATTGCTTGACAATAGGAATTTTC |                           |
| <i>FTZ-F1 F</i>    | TGGACTACACCCTCACCTGC       | (lhry et al., 2012)       |
| <i>FTZ-F1 R</i>    | CACGTTCTCCCGGCCTCTAT       |                           |
| <i>enβFTZ-F1 F</i> | TGCATGCACCGAATACAATA       | This Study                |
| <i>enβFTZ-F1 R</i> | GCTGTTCTGCTGGTGTGG         |                           |
| <i>hid F</i>       | ATCCAGTCTGCCATACCGATAG     | (lhry et al., 2012)       |
| <i>hid R</i>       | AACAGTTGGCCAAGTGAAGCTC     |                           |
| <i>ino80 F</i>     | GTTAAGGTGACGACGCTGCTG      | This Study                |
| <i>ino80 R</i>     | CCTGGCTATTCTCACACTGATTG    |                           |
| <i>phm F</i>       | TTTCGGCGCGATGTGATGACTG     | This Study                |
| <i>phm R</i>       | GCGCAGATGATGCCAAATCCAC     |                           |
| <i>rp49 F</i>      | CCAGTCGGATCGATATGCTAA      | (Denton et al., 2009)     |
| <i>rp49 R</i>      | ACGTTGTGCACCAGGAACTT       |                           |
| <i>rpr F</i>       | ATCCGAAGACCGGAAGAAAG       | (lhry et al., 2012)       |
| <i>rpr R</i>       | GTGGCTCTGTGTCCTTGACTG      |                           |
| <i>sad F</i>       | GATGTGCCAGGCGATATGAT       | (Deng and Kerppola, 2013) |
| <i>sad R</i>       | ACTGCTGAATGCGGTCGT         |                           |
| <i>Sgs3 F</i>      | CTACCGCCCTAGCGAGCAT        | (Chiang and Kurnit, 2003) |
| <i>Sgs3 R</i>      | GCATCCACAATCGCAACAGT       |                           |
| <i>spok F</i>      | GCGGTGATCGAAACAATC         | (Deng and Kerppola, 2013) |
| <i>spok R</i>      | CGAGCTAAATTTCTCCGCTTT      |                           |
